# Supplementary material
Source: PubMed Central journal article supplement (PMC2841037)
Supplement: djq011_1.pdf [file djq011_1.pdf]

Supplementary Table 1. Primer sequences\*

| Locus   | Sequence (5'→3')                                                      | Product size (bp) | Microsatellite type   |
|---------|-----------------------------------------------------------------------|-------------------|-----------------------|
| BAT26   | F: 6-FAM-TGACTACTTTTGACTTCAGCC<br>R: AACCATTCAACATTTTAAACCC           | 100–130           | Mononucleotide repeat |
| D17S250 | F: 6-FAM-GGAAGAATCAAATAG ACAAT<br>R: GTGTCTTGCTGGCCATATATATATTTAAACC  | 150–170           | Dinucleotide repeat   |
| D5S346  | F: VIC-ACTCACTCTAGTGATAAATCGGG<br>R: GTGTCTTAGCAGATAAGACAGTATTACTAGTT | 100–140           | Dinucleotide Repeat   |
| ACTC    | F: NED-TTCCATACCTGGGAACGAGT<br>R: GTGTCTTTTGACCTGAATGCACTGTGA         | 60–100            | Dinucleotide repeat   |
| D18S55  | F: NED-GGGAAGTCAAATGCAAAATC<br>R: GTGTCTTAGCTTCTGAGTAATCTTATGCTGTG    | 120–160           | Dinucleotide repeat   |
| BAT40   | F: 6-FAM-ATTAACTTCTACACCACAAC<br>R: GTAGAGCAAGACCACCTTG               | 110–140           | Mononucleotide repeat |
| D10S197 | F: 6-FAM-ACCACTGCACTTCAGGTGAC<br>R: GTGTCTTGTGATACTGTCCTCAGGTCTCC     | 160–190           | Dinucleotide repeat   |
| BAT34C4 | F: VIC-ACCCTGGAGGATTTTCATCTC<br>R: AACAAAGCGAGACCCAGTCT               | 110–140           | Mononucleotide repeat |
| MYC-L   | F: VIC-TGGCGAGACTCCATCAAAG<br>R: GTGTCTTCCTTTTAAAGCTGCAACAATTC        | 140–210           | Complex               |
| BAT25   | F: NED-TCGCCTCCAAGATGTAAGT<br>R: TCT GCA TTT TAA CTA TGG CTC          | 120–150           | Mononucleotide repeat |

\*F = forward primer; R = reverse primer; FAM, VIC and NED are spectral dyes used.
