# Supplementary material
Source: PubMed Central journal article supplement (PMC2841037)
Supplement: djq011_2.pdf [file djq011_2.pdf]

**Supplementary Table 2.** Risk estimates for MSI-high colorectal cancer according to recent body mass index, stratified by family history of colorectal cancer, *MLH1* promoter methylation status, and mismatch repair gene mutation status\*

| BMI (kg/m <sup>2</sup> ), recent† | ≥ 1 first-degree relative with colorectal cancer |                             |                      | No first-degree relative with colorectal cancer   |                             |                     |
|-----------------------------------|--------------------------------------------------|-----------------------------|----------------------|---------------------------------------------------|-----------------------------|---------------------|
|                                   | Case subjects<br>n = 80                          | Control subjects<br>n = 116 | OR (95% CI)          | Case subjects<br>n = 108                          | Control subjects<br>n = 158 | OR (95% CI)         |
| < 18.5                            | 1                                                | 1                           | 0.56 (0.02 to 19.1)  | 0                                                 | 5                           | Undefined           |
| 18.5–24.99                        | 29                                               | 45                          | 1.00 (referent)      | 47                                                | 48                          | 1.00 (referent)     |
| 25–29.99                          | 27                                               | 43                          | 0.70 (0.29 to 1.71)  | 37                                                | 72                          | 0.52 (0.27 to 1.00) |
| ≥ 30                              | 22                                               | 26                          | 0.85 (0.29 to 2.47)  | 20                                                | 33                          | 0.68 (0.30 to 1.55) |
| per 5 kg/m <sup>2</sup> ‡         | 78                                               | 114                         | 0.90 (0.60 to 1.33)  | 104                                               | 153                         | 0.95 (0.70 to 1.31) |
|                                   | <i>MLH1</i> promoter methylated §                |                             |                      | <i>MLH1</i> promoter unmethylated or not tested § |                             |                     |
|                                   | Case subjects<br>n = 61                          | Control subjects<br>n = 89  | OR (95% CI)          | Case subjects<br>n = 127                          | Control subjects<br>n = 185 | OR (95% CI)         |
| < 18.5                            | 1                                                | 3                           | 0.54 (0.04 to 7.17)  | 0                                                 | 3                           | Undefined           |
| 18.5–24.99                        | 24                                               | 31                          | 1.00 (referent)      | 52                                                | 62                          | 1.00 (referent)     |
| 25–29.99                          | 15                                               | 32                          | 0.40 (0.12 to 1.31)  | 49                                                | 83                          | 0.71 (0.40 to 1.28) |
| ≥ 30                              | 18                                               | 22                          | 0.82 (0.28 to 2.46)  | 24                                                | 37                          | 0.71 (0.32 to 1.56) |
| per 5 kg/m <sup>2</sup> ‡         | 57                                               | 85                          | 1.13 (0.74 to 1.72)  | 125                                               | 182                         | 0.87 (0.64 to 1.19) |
|                                   | MMR germline mutation §                          |                             |                      | No MMR germline mutation detected or not tested § |                             |                     |
|                                   | Case subjects<br>n = 36                          | Control subjects<br>n = 49  | OR (95% CI)          | Case subjects<br>n = 152                          | Control subjects<br>n = 225 | OR (95% CI)         |
| < 18.5                            | 0                                                | 0                           | Undefined            | 1                                                 | 6                           | 0.18 (0.02 to 1.67) |
| 18.5–24.99                        | 11                                               | 15                          | 1.00 (referent)      | 65                                                | 78                          | 1.00 (referent)     |
| 25–29.99                          | 14                                               | 24                          | 1.16 (0.31 to 4.40)  | 50                                                | 91                          | 0.61 (0.35 to 1.07) |
| ≥ 30                              | 10                                               | 10                          | 3.96 (0.59 to 26.48) | 32                                                | 49                          | 0.68 (0.34 to 1.36) |
| per 5 kg/m <sup>2</sup> ‡         | 35                                               | 49                          | 1.06 (0.64 to 1.77)  | 147                                               | 218                         | 0.98 (0.75 to 1.30) |

\*ORs adjusted for age, endoscopy screening, and cigarette smoking. Some counts do not add to totals because of missing information. MSI-High = microsatellite instability high; OR = odds ratio; CI = confidence interval; MMR = DNA mismatch repair.

†Calculated from self-reported height and weight approximately 1 year before colorectal cancer diagnosis for case subjects or approximately 1 year before enrollment for sibling control subjects.

‡BMI < 18.5 was excluded from the linear model.

§ Methods and procedures for *MLH1* promoter methylation testing and detection of MMR germline mutations are described in Poynter et al, Cancer Epidemiol Biomarkers Prev 2008; 17(11):3208-15 (reference 4 in text).
